# Supplementary material for: Simultaneous N2 and N3 coordination of inverse triazolyl-pyridine ligands in Ag(i) complexes: synthesis, structure, and application in the A3 coupling reaction to propargylamine under solvent free and low catalyst loading conditions
Source: Royal Society of Chemistry journal article supplement (doi:10.1039/d3nj03820c), 2023-01-01
Supplement: d3nj03820c1.pdf [file d3nj03820c1.pdf]

## Supporting Information

### **Simultaneous N2 and N3 Coordination of *Inverse* Triazolyl-Pyridine Ligands in Ag(I) Complexes: Synthesis, Structure, and Application in A3 Coupling Reaction to Propargylamine in Solvent free and Low Catalyst Loading**

Puneet Singh Gahlaut, Deepak Gautam, Bhawna Sekhawat, Shivani Kushwa, and Barun Jana\*

Organometallics and Supramolecular Chemistry Laboratory, Department of Chemistry, Malaviya National Institute of Technology Jaipur, JLN Marg, Jhalana Gram, Malaviya Nagar, Jaipur, Rajasthan, 302017.

Fax: 91-141-2529029; Tel: 91-141-2713319 (MNIT-J)

E-mail: barun.chy@mnit.ac.in

| <b>List of Contents</b>                                                         | <b>Page No.</b> |
|---------------------------------------------------------------------------------|-----------------|
| <b>1. General information and Materials.....</b>                                | <b>2</b>        |
| <b>2. Instrumentation.....</b>                                                  | <b>2-3</b>      |
| <b>3. General Procedure for Ligand Synthesis.....</b>                           | <b>3-4</b>      |
| <b>4. Synthesis of compound and characterization.....</b>                       | <b>4-5</b>      |
| <b>5. X-ray crystallography.....</b>                                            | <b>6</b>        |
| <b>6. General catalytic protocol for the synthesis of propargyl amines.....</b> | <b>8-9</b>      |

|                                                                           |              |
|---------------------------------------------------------------------------|--------------|
| <b>7. Characterization data for A3 coupling products.....</b>             | <b>9-12</b>  |
| <b>8. Spectral data of Ligands, catalyst and A3 coupling product.....</b> | <b>13-29</b> |
| <b>8. References.....</b>                                                 | <b>30</b>    |

## **Materials**

All the experiments were conducted under an ambient condition only if specifically stated to the use of an inert atmosphere. All the chemicals and solvents were used as received from the suppliers without further purification. Reagents, 2-bromopyridine (99%), propargyl bromide (87%), p-cresol (99%) were purchased from Spectrochem, India. Solvents hexane, ethyl acetate was purchased from Finar limited company. The A3 coupling reactions were performed in an ambient atmosphere to 70 °C. For inert atmosphere reactions, acetonitrile was dried using conventional method and was distilled before use. Normal (particle size: 100–200 mesh) and flash (particle size: 230–400 mesh) silica gels were used for column chromatography, and they were purchased from Qualigens-TM (India), Spectrochem (India), and Rankem (India). To monitor the progress of chemical reactions, TLC plates covered with silica gel (Kiesel 60-F254, Merck (India)) were utilized. UV light was the visualizing agent that was used for TLC. All the solvents were dried and concentrated using BUCHI's Rotavapor R-210. The supplied analytical-grade solvents, such as MeOH and EtOH, were all utilized without any previous purification. The chemicals and reagents acquired from Sigma Aldrich Chemicals Company (USA), TCI (India) Pvt. Ltd., Merck (India), and/or Spectrochem (India), were utilized as received. Deuterated solvent CDCl<sub>3</sub> and DMSO-d<sub>6</sub> were used to record the NMR spectrum of the synthesized compounds.

## **Instrumentation**

Nuclear magnetic resonance spectra were recorded on a JEOL ECS-400 spectrometer operating at 400 MHz for <sup>1</sup>H NMR and 101 MHz for <sup>13</sup>C{<sup>1</sup>H} NMR respectively. Tetramethyl silane (TMS) (0.00 ppm) was used as a reference internal solvent to record <sup>1</sup>H and <sup>13</sup>C{<sup>1</sup>H} NMR spectra for all the compounds. During analysis of <sup>1</sup>H NMR spectra proton peak for CDCl<sub>3</sub> was fixed at 7.246

ppm and the carbon peak was fixed at 77.0 ppm.  $^1\text{H}$  NMR patterns of chemical shifts were characterized in parts per million (ppm). The terms singlet (s), doublet (d), double of doublet (dd), triplet (t), and multiplet (m) were used to describe peak splitting patterns. The coupling constant ( $J$ ) values are given in Hertz (Hz). The Xevo G2-SQ-ToF (Waters, USA) was used to examine high-resolution electron impact mass spectra (HR-EIMS), which are compatible with ACQUITY UPLC<sup>®</sup> and nano ACQUITY UPLC<sup>®</sup> systems. The melting point of ligand and complex were determined on an analog melting point apparatus. The Bruker single crystal X-ray diffractometer was used to determine the crystallography study of Ag-complexes.

## Ligand Synthesis and characterization

### Synthesis of 2-((4-((p-tolyloxy) methyl)-1H-1,2,3-triazol-1-yl) methyl)pyridine (tmtmp) (2)

The ligand 2-((4-((p-tolyloxy) methyl)-1H-1,2,3-triazol-1-yl)methyl)pyridine was synthesized by stirring at room temperature in a round-bottom flask on a magnetic stirrer. In a round bottom flask (0.146 g, 1.00 mmol) 1-(ethynyloxy)-4-methylbenzene solution was made in methanol to which (0.147g, 1.1 mmol) 2-(azidomethyl)pyridine was added.  $\text{Cu}(\text{OAc})_2$  (2 mol%) was added to the solution and the resulting solution was stirred for 24h. After the reaction had reached completion, the workup was done with water (10 mL) and ethyl acetate ( $3 \times 20$  mL). Then, the combined organic layers were dried using anhydrous  $\text{Na}_2\text{SO}_4$ , filtered, and then concentrated under reduced pressure to afford the crude residue that was further purified utilizing column chromatography on silica gel (100–200 mesh) (99:1 - Chloroform/MeOH). The solvent was removed under reduced pressure and off-white crystalline solid of product was obtained. Yield – 73% (0.280g), based on 1-(ethynyloxy)-4-methylbenzene. Mp: 92-94 °C.  $^1\text{H}$  NMR (400 MHz, Chloroform- $d$ ):  $\delta$  8.58 (s, 1H), 7.73-7.62 (m, 2H), 7.24 – 7.18 (m, 2H), 7.01 – 6.99 (m, 2H), 6.80 (dd,  $J = 8.8, 3.2$  Hz, 2H), 5.58 (s, 2H), 5.10 (s, 2H), 2.20 (s, 3H);  $^{13}\text{C}$   $\{^1\text{H}\}$  NMR (101 MHz, Chloroform- $d$ ):  $\delta$  156.2, 154.4, 137.4, 130.6, 130.0, 123.6, 114.7, 62.2, 55.9, 20.6. HRMS (ESI<sup>+</sup>)  $m/z$  calcd. for  $\text{C}_{16}\text{H}_{16}\text{N}_4\text{O}$  ( $[\text{M} + \text{H}]^+$ ) 281.1397; found 281.1398. IR  $\nu_{\text{max}}$  ( $\text{cm}^{-1}$ ): 3132 (m,  $\text{C}_{\text{sp}2}\text{-H}$  stretch.), 3087 (w, triazole)<sup>1</sup>, 2917

(m, C<sub>sp3</sub>-H stretch.), 1611 (w, C=C<sub>sp2</sub> stretch.), 1473 (m, C<sub>sp3</sub>-H stretch.), 1242 (s, C<sub>sp3</sub>-O stretch.), 814 (s, C=C<sub>sp2</sub> bend)<sup>2</sup>. Elemental analysis for C<sub>16</sub>H<sub>16</sub>N<sub>4</sub>O: found: C, 69.05; H, 5.72; N, 18.54. Calculated: C, 68.55; H, 5.75; N, 19.19.

### Synthesis of 2-(4-((p-tolyloxy)methyl)-1H-1,2,3-triazol-1-yl)pyridine (tmtp) (3)

The ligand 2-((4-((p-tolyloxy)methyl)-1H-1,2,3-triazol-1-yl))pyridine was synthesized by refluxing in a round-bottom flask on oil bath at 60 °C. In a round bottom flask (0.146 g, 1 mmol) 1-(ethynyloxy)-4-methylbenzene solution was made in chloroform to which (0.132 g, 1.1 mmol) 2-azidopyridine was added followed by (0.258 g, 2 mmol) DIPEA. CuBr (0.028 g, 0.2 mmol) was added as a catalyst to the solution and the resulting solution was refluxed for 6h. After the reaction had reached completion, the reaction mixture was cooled to room temperature and then the workup was done with water (10 mL) and dichloromethane (3 × 20 mL). Then, the combined organic layers were dried using anhydrous Na<sub>2</sub>SO<sub>4</sub>, filtered, and then concentrated under reduced pressure to afford the crude residue that was further purified utilizing column chromatography on silica gel (100–200 mesh) (70:30 – Hexane /EtOAc). The solvent was removed under reduced pressure and brown needle shaped crystalline solid product was obtained. Yield – 75% (0.199 g), based on 1-(ethynyloxy)-4-methylbenzene. Mp: 126-128 °C. <sup>1</sup>H NMR (400 MHz, Chloroform-*d*): δ 8.57 (s, 1H), 8.43 – 8.42 (m, 1H), 8.12 (d, *J* = 8.0 Hz, 1H), 7.86 – 7.82 (m, 1H), 7.29 – 7.26 (m, 1H), 7.02 (dd, *J* = 8.8, 0.8 Hz, 2H), 6.85 (dd, *J* = 6.4, 2.4 Hz, 2H), 5.21 (d, *J* = 0.8 Hz, 2H), 2.21 (s, 3H); <sup>13</sup>C {<sup>1</sup>H} NMR (101 MHz, Chloroform-*d*): δ 156.1, 149.1, 148.6, 144.9, 139.3, 130.7, 130.1, 123.8, 120.4, 114.8, 114.0, 62.0, 20.6. HRMS (ESI<sup>+</sup>) *m/z* calcd. for C<sub>15</sub>H<sub>14</sub>N<sub>4</sub>O ([M + H]<sup>+</sup>) 267.1241; found 267.1229. IR *v*<sub>max</sub> (cm<sup>-1</sup>): 3135 (w, C<sub>sp2</sub>-H stretch.), 3090 (w, triazole)<sup>1</sup>, 2915 (w, C<sub>sp3</sub>-H stretch.), 1240 (s, C<sub>sp3</sub>-O stretch.), 817 (s, C=C<sub>sp2</sub> bend.)<sup>2</sup> Elemental analysis for C<sub>15</sub>H<sub>14</sub>N<sub>4</sub>O: found: C, 68.25; H, 5.20; N, 20.85. Calculated: C, 67.65; H, 5.30; N, 21.04.

## Synthesis of compound and characterization

### Compound 4

For the synthesis of compound **4** the tmtmp ligand (0.280 g, 1 mmol) solution was made in methanol (1 ml) in a 50 ml round bottom flask and to it methanolic solution of AgNO<sub>3</sub> (0.171 g, 1.01 mmol) was added dropwise. The round bottom flask was covered with foil paper due to the light sensitivity of the complex and was stirred at room temperature for 12h. After the completion of the reaction, the reaction mixture was filtered using a Buchner funnel. A white solid was obtained as product which was dried and kept in dark. Yield – 61% (0.593 g), based on ligand (tmtmp). Mp: 178-180 °C. <sup>1</sup>H NMR (400 MHz, Acetonitrile-*d*<sub>3</sub>): δ 8.47 – 8.45 (m, 2H), 7.95 (s, 2H), 7.76 – 7.72 (m, 2H), 7.29 – 7.26 (m, 4H), 7.01 (dd, *J* = 9.2, 0.8 Hz, 4H), 6.80 – 6.77 (m, 4H), 5.60 (s, 4H), 5.02 (s, 4H), 2.17 (s, 6H); <sup>13</sup>C {<sup>1</sup>H} NMR (101 MHz, Acetonitrile-*d*<sub>3</sub>): δ 156.2, 154.5, 150.2, 144.2, 137.9, 130.5, 130.00, 125.00, 123.8, 122.0, 114.7, 61.3, 55.4, 19.5. HRMS (ESI<sup>+</sup>) *m/z* calcd. for [M-2NO<sub>3</sub>]<sup>2+</sup> = 387.0370; found 387.0366. IR *v*<sub>max</sub> (cm<sup>-1</sup>): 3133 (m, C<sub>sp2</sub>-H stretch.), 3088 (m, triazole) 2919 (m, C<sub>sp3</sub>-H stretch.), 1378 (s, N=O stretch.), 1242 (s, C<sub>sp3</sub>-O stretch), 816 (m, C=C<sub>sp2</sub> bend)<sup>2</sup>. Elemental analysis for C<sub>32</sub>H<sub>32</sub>Ag<sub>2</sub>N<sub>10</sub>O<sub>8</sub>: Satisfactory elemental analysis data was not obtained despite several attempts.

## Compound 5

For the synthesis of compound **5** the (ttmp) ligand (0.266 g, 1 mmol) solution was made in methanol (1 ml) in a 50 ml round bottom flask and to it methanolic solution of AgNO<sub>3</sub> (0.171 g, 1.01 mmol) was added dropwise. The round bottom flask was covered with foil paper due to the light sensitivity of the complex and was stirred at room temperature for 12h. After the completion of the reaction, the reaction mixture was filtered using a Buchner funnel. A white solid was obtained as product which was dried and kept in dark. Yield – 58% (0.561 g), based on ligand (ttmp). Mp: 210-213 °C. <sup>1</sup>H NMR (400 MHz, Acetonitrile-*d*<sub>3</sub>) δ 8.61 (s, 2H), 8.46 (ddd, *J* = 4.8,

2.0, 0.8 Hz, 2H), 8.05-8.03 (2H), 7.97 – 7.93 (m, 2H), 7.40 - 7.37 (m, 2H), 7.04 (dd,  $J = 8.8, 0.8$  Hz, 4H), 6.88 – 6.84 (m, 4H), 5.14 (s, 4H), 2.10 (s, 6H);  $^{13}\text{C}\{^1\text{H}\}$  NMR (101 MHz, Acetonitrile- $d_3$ ):  $\delta$  155.8, 148.6, 144.2, 139.4, 130.2, 129.6, 123.9, 120.7, 114.4, 113.5, 60.9, 19.2. HRMS (ESI $^+$ )  $m/z$  calcd. for  $[\text{M}-2\text{NO}_3]^{2+} = 373.0213$ ; found 373.0207. IR  $\nu_{\text{max}}$  ( $\text{cm}^{-1}$ ): 3138 (w,  $\text{C}_{\text{sp}2}\text{-H}$  stretch.), 3087 (w, triazole) $^1$ , 1587 (m,  $\text{N}=\text{O}$  stretch.), 1240 (s,  $\text{C}_{\text{sp}3}\text{-O}$  stretch.), 817 (s,  $\text{C}=\text{C}_{\text{sp}2}$  bend.) $^2$ . Elemental analysis for  $\text{C}_{30}\text{H}_{28}\text{Ag}_2\text{N}_{10}\text{O}_8$ : Satisfactory elemental analysis data was not obtained despite several attempts.

## X-ray crystallography

### 2-D polymeric structure of complex 4

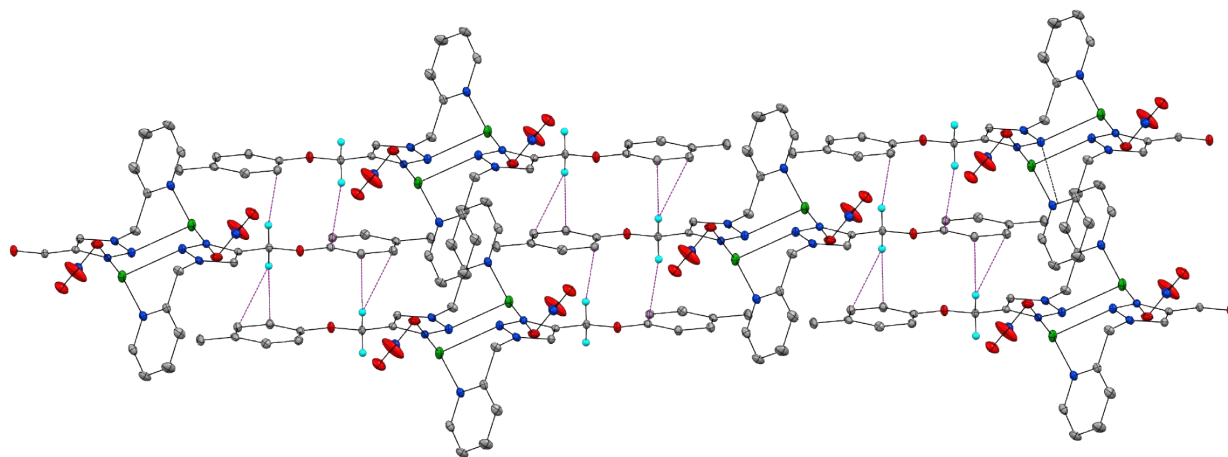

**Fig. S1** C-H $\cdots\pi$  interaction to generate 2D polymeric structure of complex 4

Comparison table with respect to previous work [Table 1]

| Catalyst                                                                                                                     | Reaction conditions                                                 | References |
|------------------------------------------------------------------------------------------------------------------------------|---------------------------------------------------------------------|------------|
| 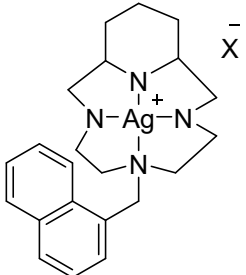                                            | [catalyst: 3.0 mol%; time: 4.5 h; MW; Toluene; 150 °C]              | 3          |
| <p>CuI with <b>5j</b></p>  <p><b>5j</b></p> | [CuI: 4 mol%, <b>5j</b> : 3.0 mol%; time: 12 h; 5 Å MS; DCM; 0 °C]  | 4          |
| [Ag(IPr) <sub>2</sub> ]PF <sub>6</sub>                                                                                       | [catalyst: 3.0 mol%; time: 1 h; MW; MeOH; 110 °C]                   | 5          |
| Ag-metalloligand based polymer                                                                                               | [catalyst: 1.0 mol%; time: 1 h; neat; 80 °C]                        | 6          |
|                                           | [catalyst: (0.5- 2 mol%); time:12 h; iPrOH; 90 °C]                  | 7          |
| Inorganic-Organic hybrid Ag-polyoxometalates                                                                                 | [catalyst: 0.5 mol%; time:6 h; ACN; RT]                             | 8          |
|                                           | [catalyst: 3 mol%; time:6 h; 80 °C; Au-NHC catalyst most effective] | 9          |
|                                           | [catalyst: 5 mol%; time:5 h; DES; 60 °C]                            | 10         |
| Ag-nanoparticle Zr-based Metal organic framework                                                                             | [catalyst: 20 mg; time:6 h; ACN; 80 °C]                             | 11         |
| Ag-nanoparticle Cu-based Metal organic framework                                                                             | [catalyst: 75 mg; time:1 h; EtOH; 80 °C]                            | 12         |

## General catalytic protocol for synthesis of propargyl amines

### Procedure 1

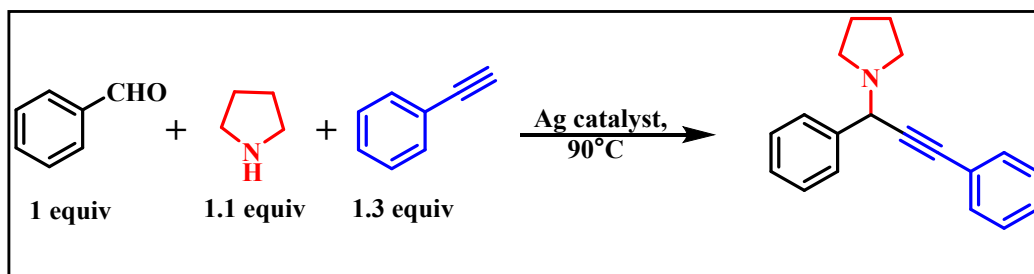

A mixture of aldehyde (1 mmol), amine (1.1 mmol), alkyne (1.3 mmol), Ag catalyst (catalyst 4, 0.25 mol%) was placed in a sealed tube in the absence of solvent and the reaction mixture was heated at 70°C for 5h. The reaction mixture was cooled to room temperature and then the workup was done with water (10 mL) and ethyl acetate (3 × 20 mL). Then, the combined organic layers were dried using anhydrous Na<sub>2</sub>SO<sub>4</sub>, filtered, and then concentrated under reduced pressure to afford the crude residue that was further purified utilizing column chromatography on silica gel (100–200 mesh) (99:1 to 95:5 - Hexane/EtOAc). The solvent was removed under reduced pressure and products were obtained as pale-yellow oily liquids. In good yield of about 81 – 98%.

### Procedure 2

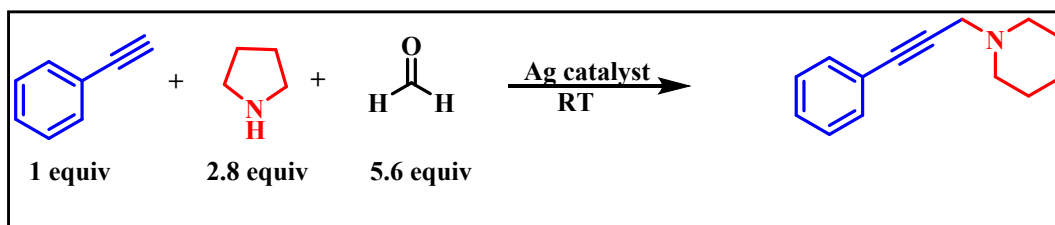

A mixture of aldehyde (1 mmol), amine (2.8 mmol), alkyne (5.6 mmol), Ag catalyst (catalyst 4, 0.25 mol%) was placed in a sealed tube in the absence of solvent and the reaction mixture was stirred at room temperature for 2h. The workup was done with water (10 mL) and ethyl acetate (3 × 20 mL). Then, the combined organic layers were dried using anhydrous Na<sub>2</sub>SO<sub>4</sub>, filtered, and



then concentrated under reduced pressure to afford the crude residue that was further purified utilizing column chromatography on silica gel (100–200 mesh) (99:1 to 95:5 - Hexane/EtOAc). The solvent was removed under reduced pressure and propargylamines were obtained as pale-yellow oily liquid.

### Characterization data for A3 coupling products

| S.No | Substrate                                                                           | Data analysis                                                                                                                                                                                                                                                                                                                                                                                                                                                                                                                                                                                |
|------|-------------------------------------------------------------------------------------|----------------------------------------------------------------------------------------------------------------------------------------------------------------------------------------------------------------------------------------------------------------------------------------------------------------------------------------------------------------------------------------------------------------------------------------------------------------------------------------------------------------------------------------------------------------------------------------------|
| 9aaa | 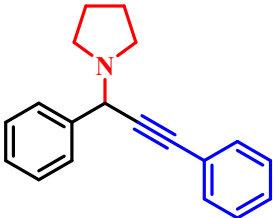  | The reaction of aromatic aldehyde (1 mmol), alicyclic secondary amine (1.1 mmol) and phenyl acetylene (1.3 mmol) and Ag catalyst (0.25 mol %) at 90°C for 5 h can afford compound <b>9aaa</b> in 95% (0.248g) yield as a according to the <b>general procedure A</b> .<br><sup>1</sup> H NMR (400 MHz, Chloroform- <i>d</i> ) δ 7.55 – 7.53 (m, 2H), 7.42 – 7.40 (m, 2H), 7.30 – 7.21 (m, 6H), 4.84 (s, 1H), 2.66 – 2.63 (m, 4H), 1.75 – 1.71 (m, 4H). Spectral data are in good agreement with literature values <sup>3,7</sup> .                                                           |
| 9baa |  | The reaction of aromatic aldehyde (1 mmol), alicyclic secondary amine (1.1 mmol) and phenyl acetylene (1.3 mmol) and Ag catalyst (0.25 mol %) at 90°C for 5 h can afford compound <b>9baa</b> in 93% (0.271g) yield as an according to the <b>general procedure A</b> .<br><sup>1</sup> H NMR (400 MHz, Chloroform- <i>d</i> ) δ 7.48 (d, <i>J</i> = 8.4 Hz, 2H), 7.42 – 7.40 (m, 2H), 7.25 – 7.22 (m, 3H), 6.81 (d, <i>J</i> = 8.8 Hz, 2H), 4.89 (s, 1H), 3.72 (s, 3H), 2.75 – 2.69 (m, 4H), 1.78 – 1.74 (m, 4H). Spectral data are in good agreement with literature values <sup>7</sup> . |
| 9caa |  | The reaction of aromatic aldehyde (1 mmol), alicyclic secondary amine (1.1 mmol) and phenyl acetylene (1.3 mmol) and Ag catalyst (0.25 mol %) at 90°C for 5 h can afford compound <b>9caa</b> in 91% (0.250g) yield as a according to the <b>general procedure A</b> .<br><sup>1</sup> H NMR (400 MHz, Chloroform- <i>d</i> ) δ 7.42 – 7.39 (m, 4H), 7.23 – 7.22 (m, 3H), 7.09 – 7.07 (m, 2H), 4.79 (s, 1H), 2.65 – 2.61 (m, 4H), 2.27 (s, 3H), 1.74 – 1.70 (m, 4H).                                                                                                                         |

|             |                                                                                     |                                                                                                                                                                                                                                                                                                                                                                                                                                                                                                                                                              |
|-------------|-------------------------------------------------------------------------------------|--------------------------------------------------------------------------------------------------------------------------------------------------------------------------------------------------------------------------------------------------------------------------------------------------------------------------------------------------------------------------------------------------------------------------------------------------------------------------------------------------------------------------------------------------------------|
|             |                                                                                     | Spectral data are in good agreement with literature values <sup>7</sup> .                                                                                                                                                                                                                                                                                                                                                                                                                                                                                    |
| <b>9daa</b> | 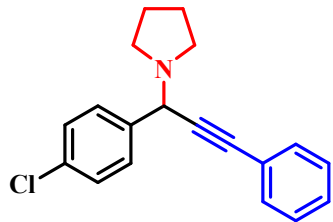   | The reaction of aromatic aldehyde (1 mmol), alicyclic secondary amine (1.1 mmol) and phenyl acetylene (1.3 mmol) and Ag catalyst (0.25 mol %) at 90°C for 5 h can afford compound <b>9daa</b> in 87% (0.258g) yield as a according to the <b>general procedure A</b> .<br><sup>1</sup> H NMR (400 MHz, Chloroform- <i>d</i> ) $\delta$ 7.47 (dd, <i>J</i> = 6.4, 2 Hz, 2H), 7.42 – 7.39 (m, 2H), 7.26 – 7.23 (m, 5H), 4.80 (s, 1H), 2.62 – 2.58 (m, 4H), 1.75 – 1.68 (m, 4H). Spectral data are in good agreement with literature values <sup>7</sup> .      |
| <b>9eaa</b> |    | The reaction of aromatic aldehyde (1 mmol), alicyclic secondary amine (1.1 mmol) and phenyl acetylene (1.3 mmol) and Ag catalyst (0.25 mol %) at 90°C for 5 h can afford compound <b>9eaa</b> in 81% (0.225g) yield as a according to the <b>general procedure A</b> .<br><sup>1</sup> H NMR (400 MHz, Chloroform- <i>d</i> ) $\delta$ 7.49 – 7.45 (m, 3H), 7.32 – 7.27 (m, 4H), 7.17 – 7.14 (m, 1H), 6.84 – 6.79 (m, 2H), 5.30 (s, 1H), 2.89 – 2.79 (m, 4H), 1.86 – 1.82 (m, 4H). Spectral data are in good agreement with literature values <sup>7</sup> . |
| <b>9aba</b> |  | The reaction of aromatic aldehyde (1 mmol), alicyclic secondary amine (1.1 mmol) and phenyl acetylene (1.3 mmol) and Ag catalyst (0.25 mol %) at 90°C for 5 h can afford compound <b>9aba</b> in 84% (0.231g) yield as a according to the <b>general procedure A</b> .<br><sup>1</sup> H NMR (400 MHz, Chloroform- <i>d</i> ) $\delta$ 7.68-7.65 (m, 2H), 7.55 – 7.52 (m, 2H), 7.43 – 7.30 (m, 6H), 4.83 (s, 1H), 2.60-2.58 (m, 4H), 1.64-1.59 (m, 4H), 1.49-1.44 (m, 2H). Spectral data are in good agreement with literature values <sup>13,14</sup> .     |
| <b>9aca</b> |  | The reaction of aromatic aldehyde (1 mmol), alicyclic secondary amine (1.1 mmol) and phenyl acetylene (1.3 mmol) and Ag catalyst (0.25 mol %) at 90°C for 5 h can afford compound <b>9aca</b> in 86% (0.239g) yield as a according to the <b>general procedure A</b> .<br><sup>1</sup> H NMR (400 MHz, Chloroform- <i>d</i> ) $\delta$ 7.58 (d, <i>J</i> = 6.8 Hz, 2H), 7.46 – 7.43 (m, 2H), 7.32 – 7.24 (m, 6H), 4.75 (s, 1H), 3.70 – 3.66 (m, 4H), 2.60 – 2.58 (m, 4H). Spectral data are in good agreement with literature values <sup>15</sup> .         |

|             |                                                                                   |                                                                                                                                                                                                                                                                                                                                                                                                                                                                                                                                                                                                              |
|-------------|-----------------------------------------------------------------------------------|--------------------------------------------------------------------------------------------------------------------------------------------------------------------------------------------------------------------------------------------------------------------------------------------------------------------------------------------------------------------------------------------------------------------------------------------------------------------------------------------------------------------------------------------------------------------------------------------------------------|
|             |                                                                                   |                                                                                                                                                                                                                                                                                                                                                                                                                                                                                                                                                                                                              |
| <b>9faa</b> | 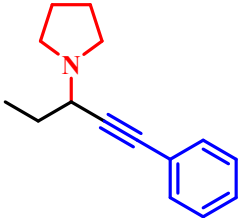 | <p>The reaction of aromatic aldehyde (1 mmol), alicyclic secondary amine (1.1 mmol) and phenyl acetylene (1.3 mmol) and Ag catalyst (0.25 mol %) at 90°C for 5 h can afford compound <b>9faa</b> in 89% (0.190g) yield as a according to the <b>general procedure A</b>.</p> <p><sup>1</sup>H NMR (400 MHz, Chloroform-<i>d</i>) δ 7.37 – 7.35 (m, 2H), 7.23 – 7.21 (m, 3H), 3.55-3.51 (m, 1H), 2.73 – 2.62 (m, 4H), 1.76 – 1.67 (m, 6H), 1.04 – 1.00 (m, 3H). Spectral data are in good agreement with literature values<sup>16</sup>.</p>                                                                  |
| <b>9gba</b> |  | <p>The reaction of aromatic aldehyde (1 mmol), alicyclic secondary amine (1.1 mmol) and phenyl acetylene (1.3 mmol) and Ag catalyst (0.25 mol %) at 90°C for 5 h can afford compound <b>9gba</b> in 86% (0.208g) yield as a according to the <b>general procedure A</b>.</p> <p><sup>1</sup>H NMR (400 MHz, Chloroform-<i>d</i>) δ 7.38 – 7.36 (m, 2H), 7.24 – 7.22 (m, 3H), 3.51 – 3.48 (m, 1H), 2.71 – 2.66 (m, 2H), 2.51 – 2.47 (m, 2H), 1.71 – 1.64 (m, 3H), 1.60 – 1.49 (m, 4H), 1.44 – 1.37 (m, 3H), 0.92 – 0.88 (m, 3H). Spectral data are in good agreement with literature values<sup>15</sup>.</p> |

| S.No         |                                                                                     |                                                                                                                                                                                                                                                                                                                                                                                                                                                                                                     |
|--------------|-------------------------------------------------------------------------------------|-----------------------------------------------------------------------------------------------------------------------------------------------------------------------------------------------------------------------------------------------------------------------------------------------------------------------------------------------------------------------------------------------------------------------------------------------------------------------------------------------------|
| <b>13aaa</b> | 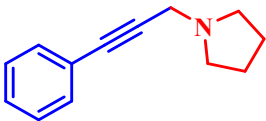 | <p>The reaction of phenyl acetylene (1 mmol), alicyclic secondary amine (2.8 mmol), formaldehyde (5.6) and Ag catalyst (0.25 mol %) at RT for 5 h can afford compound <b>13aaa</b> in 98% (0.181g) yield as a according to the <b>general procedure B</b>.</p> <p><sup>1</sup>H NMR (400 MHz, Chloroform-<i>d</i>) δ 7.37 – 7.34 (m, 2H), 7.22 – 7.20 (m, 3H), 3.56 (s, 2H), 2.64 – 2.61 (m, 4H), 1.78 – 1.74 (m, 4H). Spectral data are in good agreement with literature values<sup>17</sup>.</p> |
| <b>13aba</b> |  | <p>The reaction of phenyl acetylene (1 mmol), alicyclic secondary amine (2.8 mmol), formaldehyde (5.6) and Ag catalyst (0.25 mol %) at RT for 5 h can afford compound <b>13aba</b> in 96% (0.191g) yield as a according to the <b>general procedure B</b>.</p> <p><sup>1</sup>H NMR (400 MHz, Chloroform-<i>d</i>) δ 7.36 – 7.34 (m, 2H), 7.20 – 7.18 (m, 3H), 3.39 (s, 2H), 2.49 (s, 4H), 1.56 (m, 4H), 1.36 (s, 2H). Spectral data are in good agreement with literature values<sup>8</sup>.</p>  |

|                     |                                                                                     |                                                                                                                                                                                                                                                                                                                                                                                                                                                                                                                                                                    |
|---------------------|-------------------------------------------------------------------------------------|--------------------------------------------------------------------------------------------------------------------------------------------------------------------------------------------------------------------------------------------------------------------------------------------------------------------------------------------------------------------------------------------------------------------------------------------------------------------------------------------------------------------------------------------------------------------|
| <p><b>13aca</b></p> | 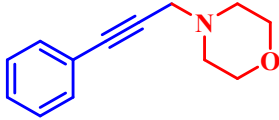   | <p>The reaction of phenyl acetylene (1 mmol), alicyclic secondary amine (2.8 mmol), formaldehyde (5.6) and Ag catalyst (0.25 mol %) at RT for 5 h can afford compound <b>13aca</b> in 95% (0.191g) yield as a according to the <b>general procedure B</b>.<br/> <sup>1</sup>H NMR (400 MHz, Chloroform-<i>d</i>) δ 7.38 – 7.35 (m, 2H), 7.24 – 7.22 (m, 3H), 3.71 – 3.69 (m, 4H), 3.44 (s, 2H), 2.59 – 2.57 (m, 4H). Spectral data are in good agreement with literature values<sup>8</sup>.</p>                                                                   |
| <p><b>13bba</b></p> |    | <p>The reaction of phenyl acetylene (1 mmol), alicyclic secondary amine (2.8 mmol), formaldehyde (5.6) and Ag catalyst (0.25 mol %) at RT for 5 h can afford compound <b>13bba</b> in 95% (0.248g) yield as a according to the <b>general procedure B</b>.<br/> <sup>1</sup>H NMR (400 MHz, Chloroform-<i>d</i>) δ 7.31 – 7.29 (m, 2H), 7.25 – 7.22 (m, 2H), 3.40 (s, 2H), 2.50 (s, 4H), 1.60 – 1.54 (m, 4H), 1.37 (d, <i>J</i> = 5.6 Hz, 2H), 1.22 (s, 9H). Spectral data are in good agreement with literature values<sup>18,19</sup>.</p>                       |
| <p><b>13cba</b></p> |  | <p>The reaction of phenyl acetylene (1 mmol), alicyclic secondary amine (2.8 mmol), formaldehyde (5.6) and Ag catalyst (0.25 mol %) at RT for 5 h can afford compound <b>13cba</b> in 98% (0.223g) yield as a according to the <b>general procedure B</b>.<br/> <sup>1</sup>H NMR (400 MHz, Chloroform-<i>d</i>) δ 7.28 (d, <i>J</i> = 8.4 Hz, 2H), 7.04 (d, <i>J</i> = 8.0 Hz, 2H), 3.41 (s, 2H), 2.58 – 2.52 (m, 6H), 1.61 – 1.53 (m, 4H), 1.40 - 1.34 (m, 2H), 1.16 – 1.11 (m, 3H). Spectral data are in good agreement with literature values<sup>8</sup>.</p> |
| <p><b>13dba</b></p> |  | <p>The reaction of phenyl acetylene (1 mmol), alicyclic secondary amine (2.8 mmol), formaldehyde (5.6) and Ag catalyst (0.25 mol %) at RT for 5 h can afford compound <b>13dba</b> in 91% (0.194g) yield as a according to the <b>general procedure B</b>.<br/> <sup>1</sup>H NMR (400 MHz, Chloroform-<i>d</i>) δ 7.33 (d, <i>J</i> = 7.6 Hz, 1H), 7.15 – 7.10 (m, 2H), 7.07 – 7.03 (m, 1H), 3.55 (s, 2H), 2.60 (s, 4H), 2.36 (s, 3H), 1.66 – 1.60 (m, 4H), 1.41 – 1.38 (m, 2H). Spectral data are in good agreement with literature values<sup>20</sup>.</p>     |

## Spectral data of Ligands, catalyst and A3 coupling product

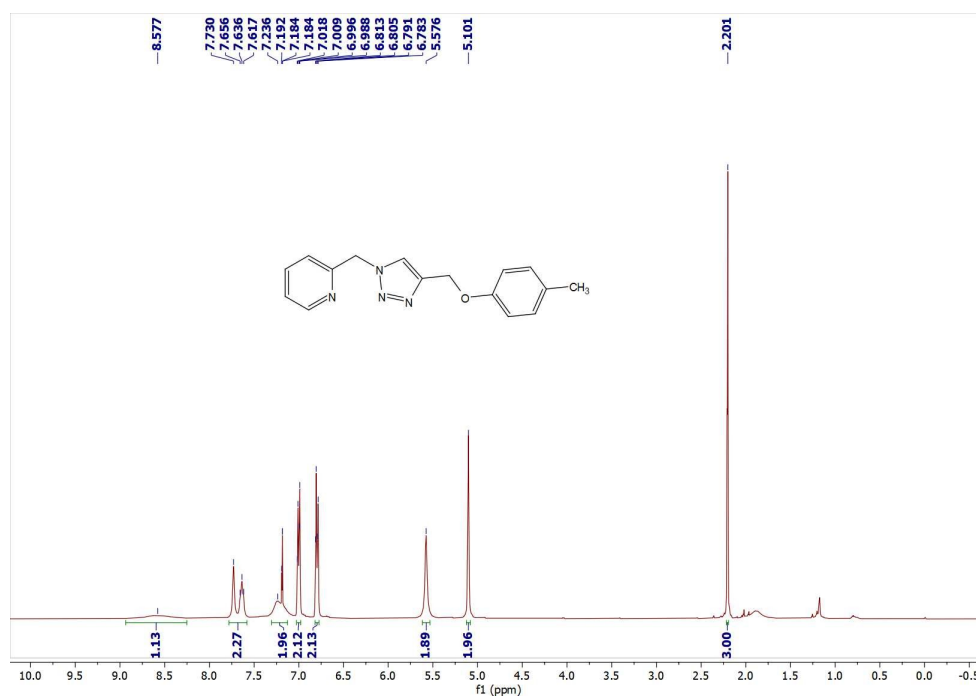

**Fig. S2** <sup>1</sup>H NMR spectrum of **2** in CDCl<sub>3</sub> (400 MHz)

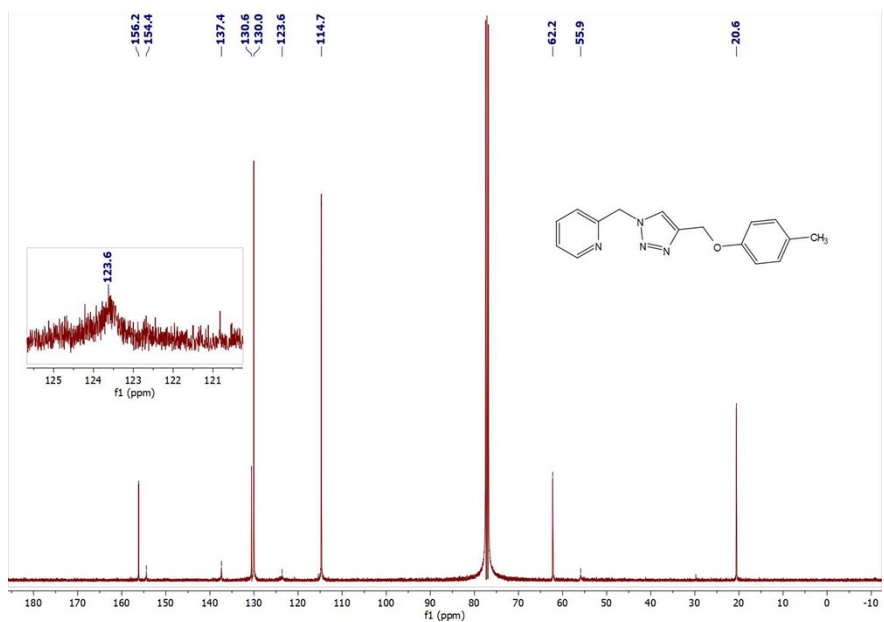

**Fig. S3**  $^{13}\text{C}$  NMR spectrum of **2** in  $\text{CDCl}_3$  (101 MHz)

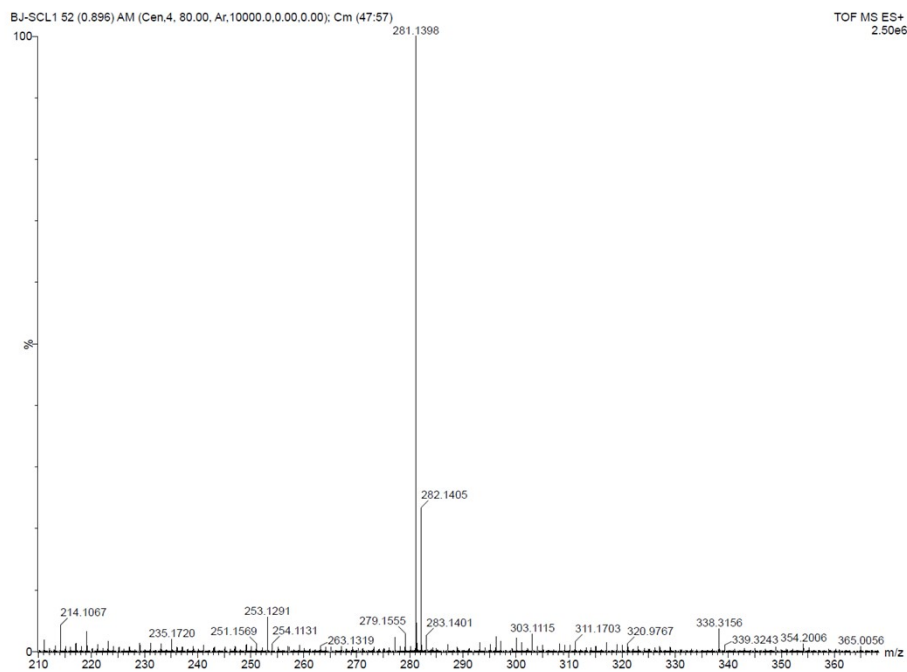

**Fig. S4** ESI mass spectrum of **2**

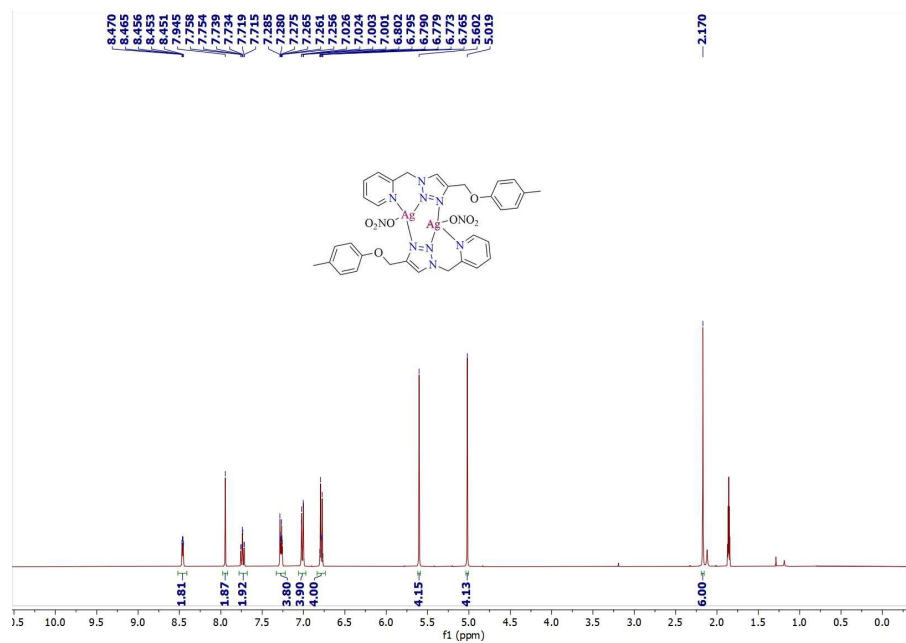

**Fig. S5**  $^1\text{H}$  NMR spectrum of 4 in Acetonitrile- $d_3$  (400 MHz)

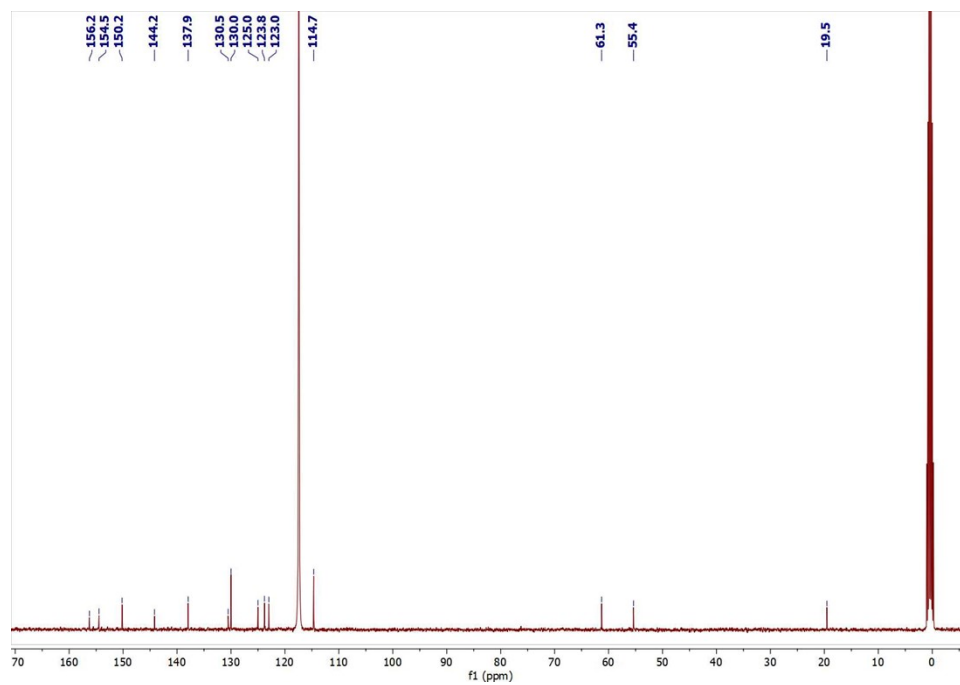

**Fig. S6**  $^{13}\text{C}$  NMR spectrum of 4 in Acetonitrile- $d_3$  (101 MHz)

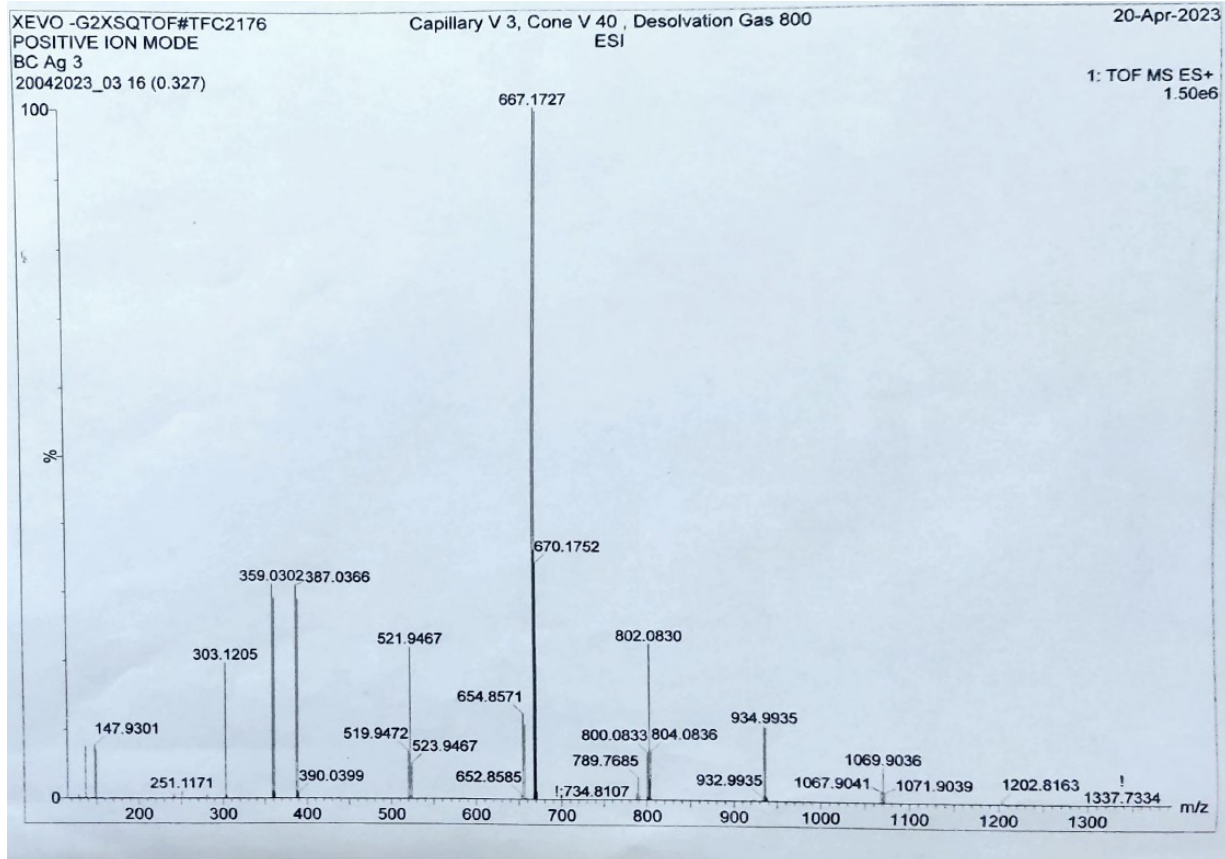

Fig. S7 ESI mass spectrum of 4



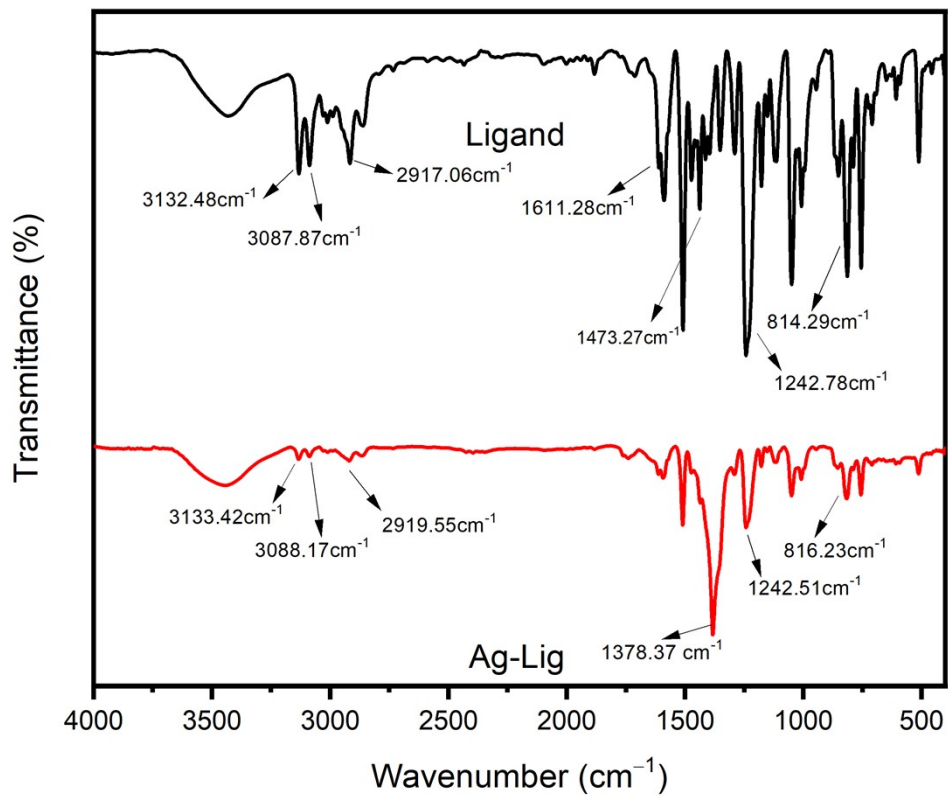

**Fig. S8** FT-IR spectrum of ligand **2** and catalyst **4**

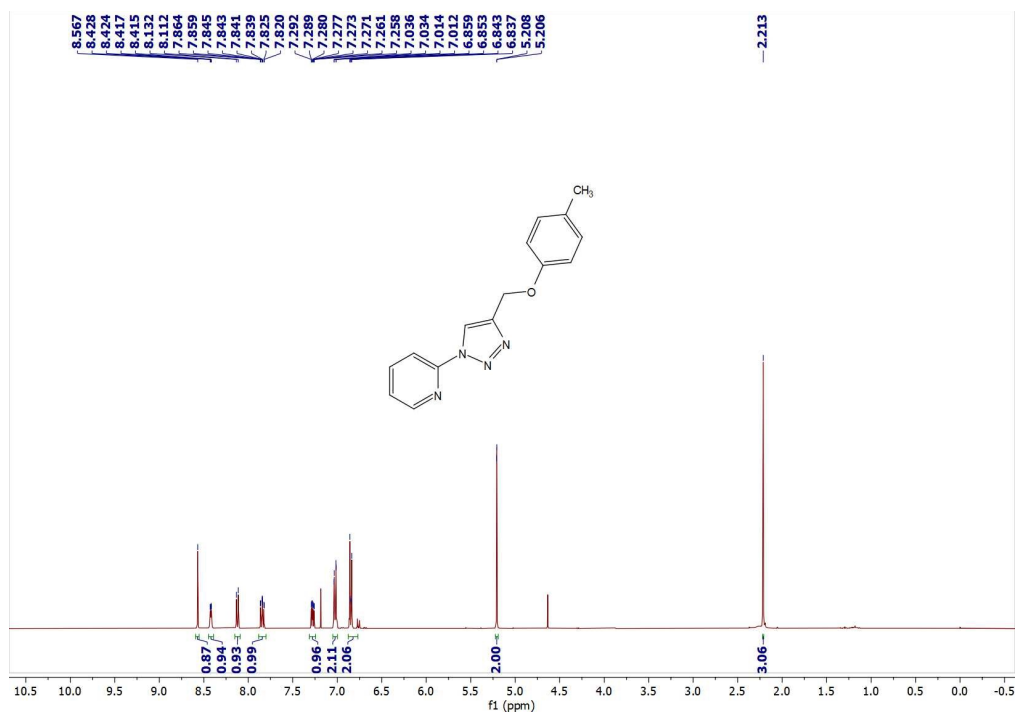

Fig. S9  $^1\text{H}$  NMR spectrum of **3** in  $\text{CDCl}_3$  (400 MHz)

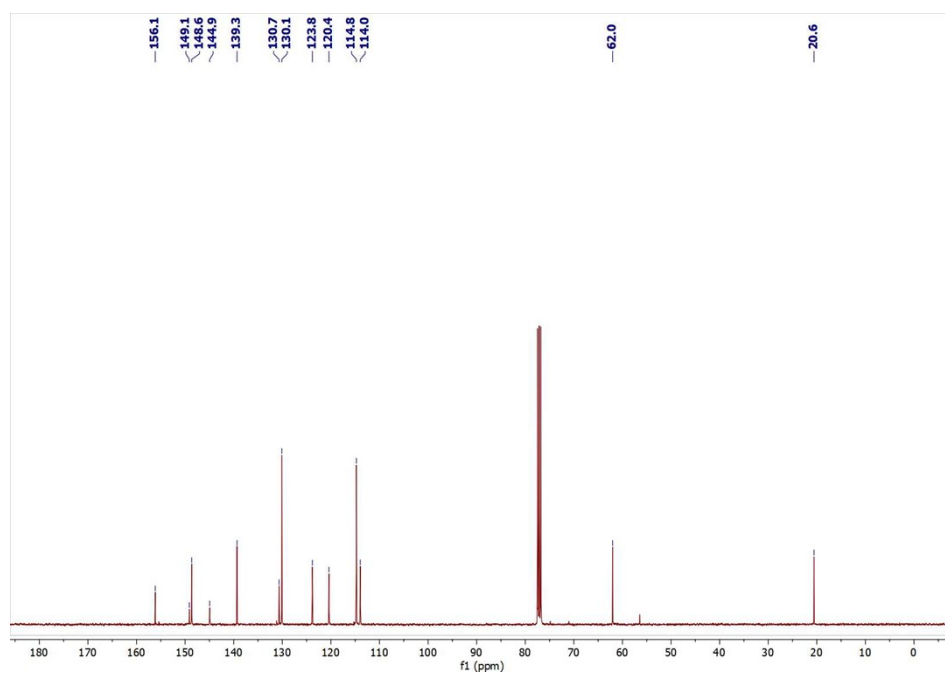

Fig. S10  $^{13}\text{C}$  NMR spectrum of **3** in  $\text{CDCl}_3$  (101 MHz)

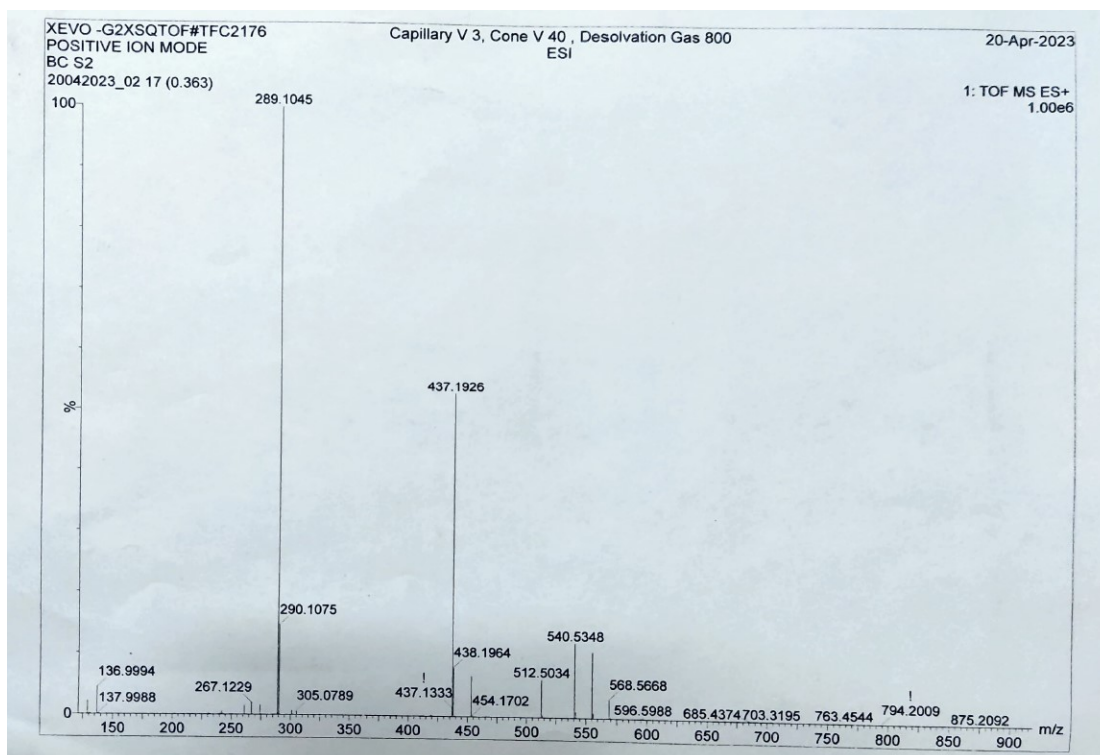

**Fig. S11** ESI mass spectrum of **3**

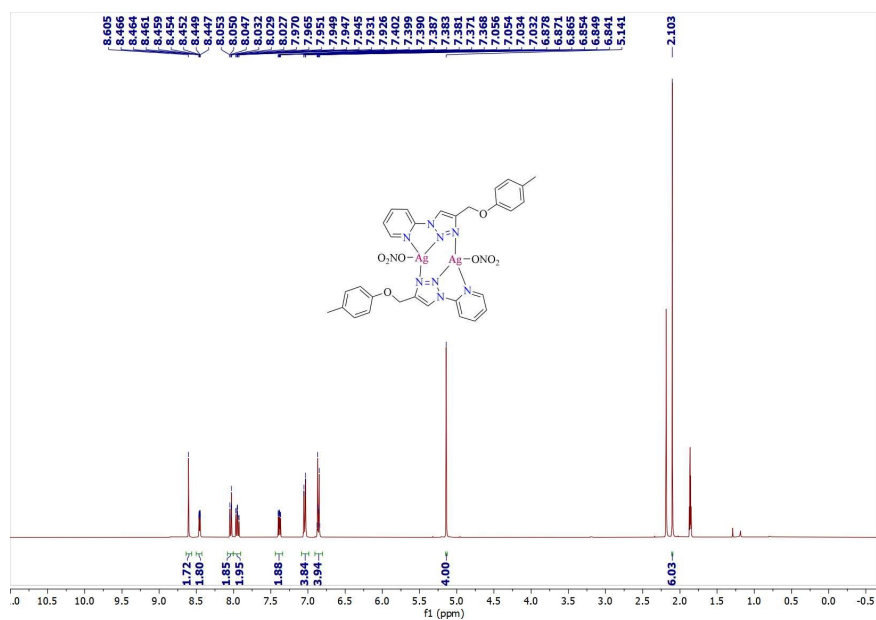

**Fig. S12**  $^1\text{H}$  NMR spectrum of **5** in Acetonitrile- $d_3$  (400 MHz)

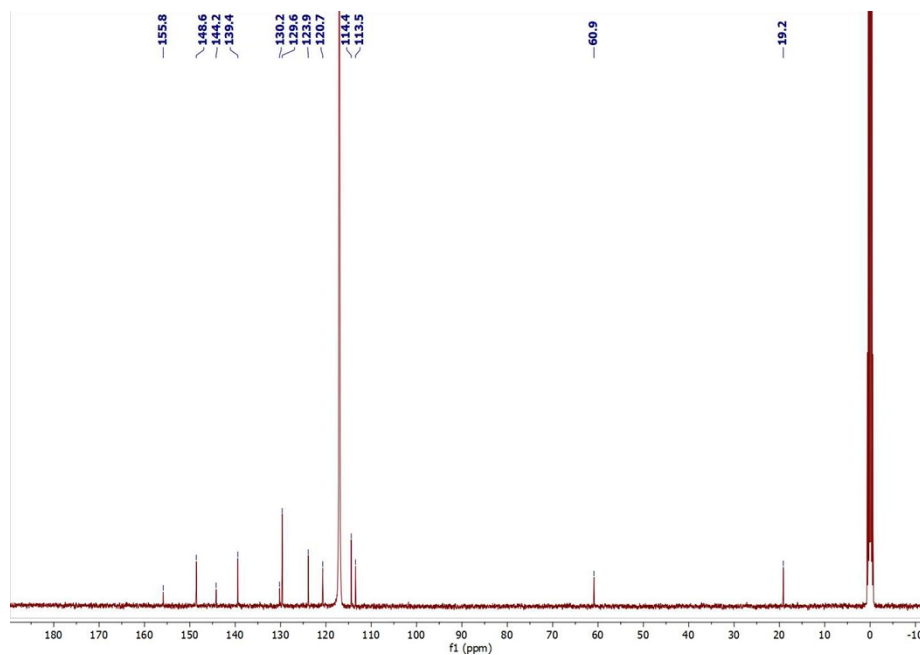

Fig. S13  $^{13}\text{C}$  NMR spectrum of **5** in Acetonitrile- $d_3$  (101 MHz)

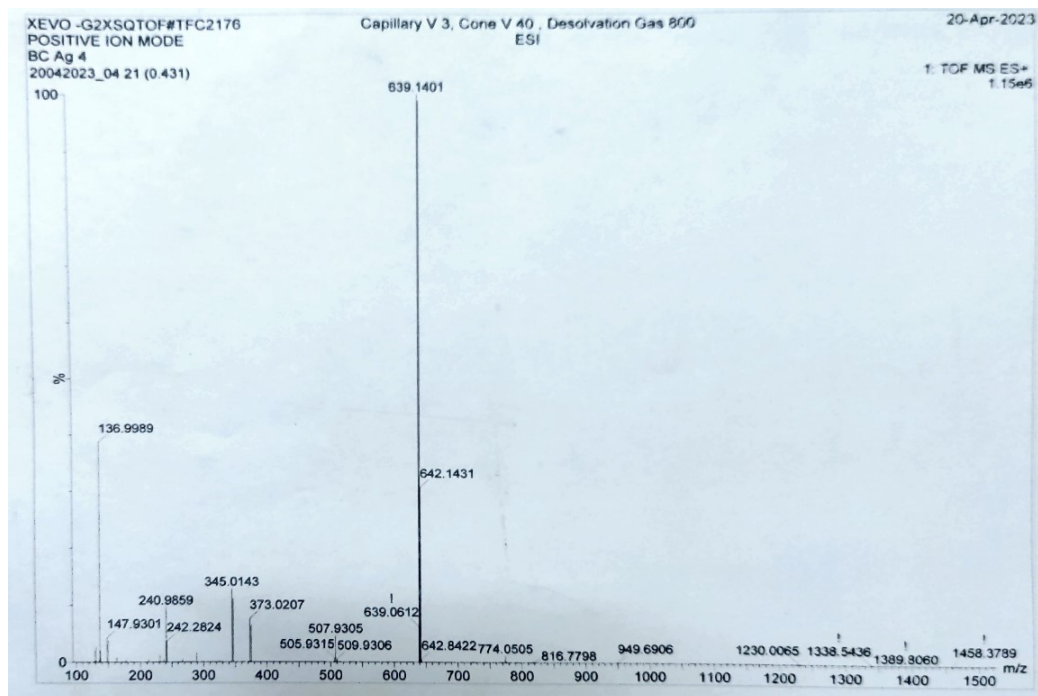

**Fig. S14** ESI mass spectrum of **5**

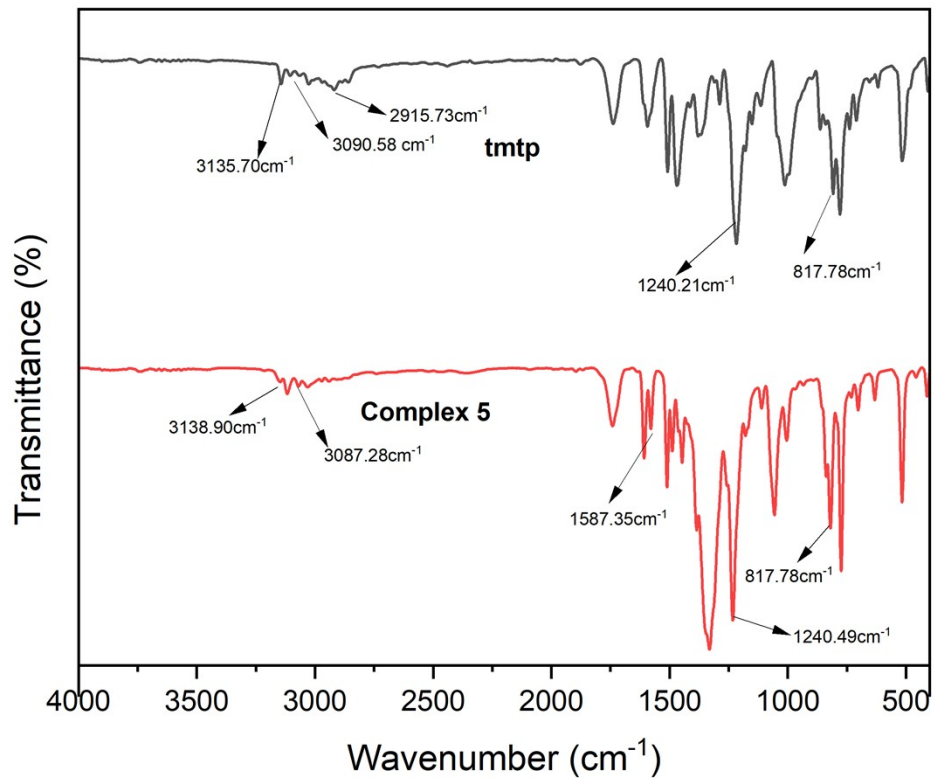

**Fig. S15** FT-IR spectrum of ligand **3** and catalyst **5**

Characterization data of A3 coupling product 9aaa-9gba and 13aaa-13dba.

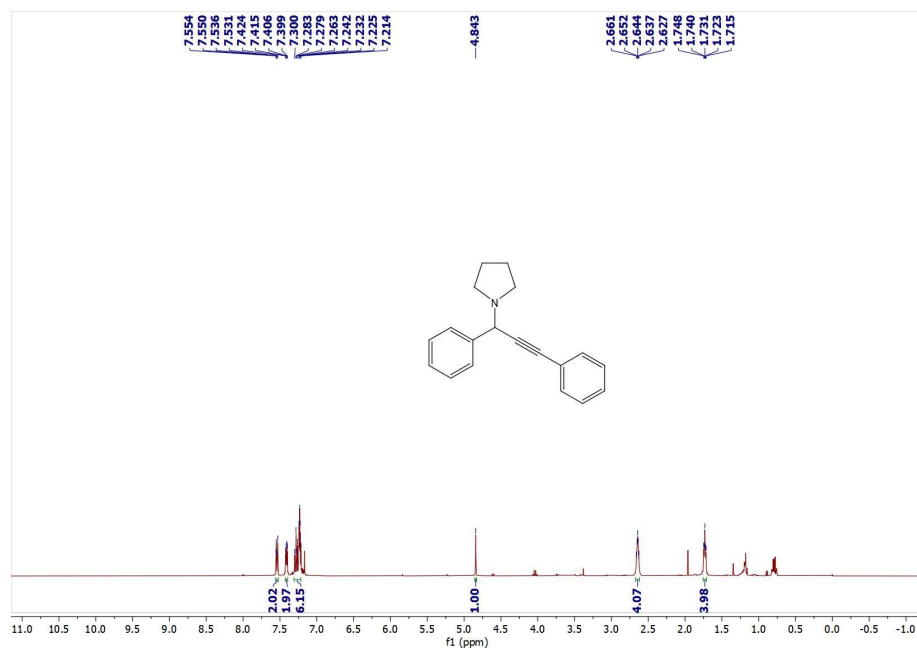

Fig. S16 <sup>1</sup>H NMR spectrum of 9aaa in CDCl<sub>3</sub> (400 MHz)

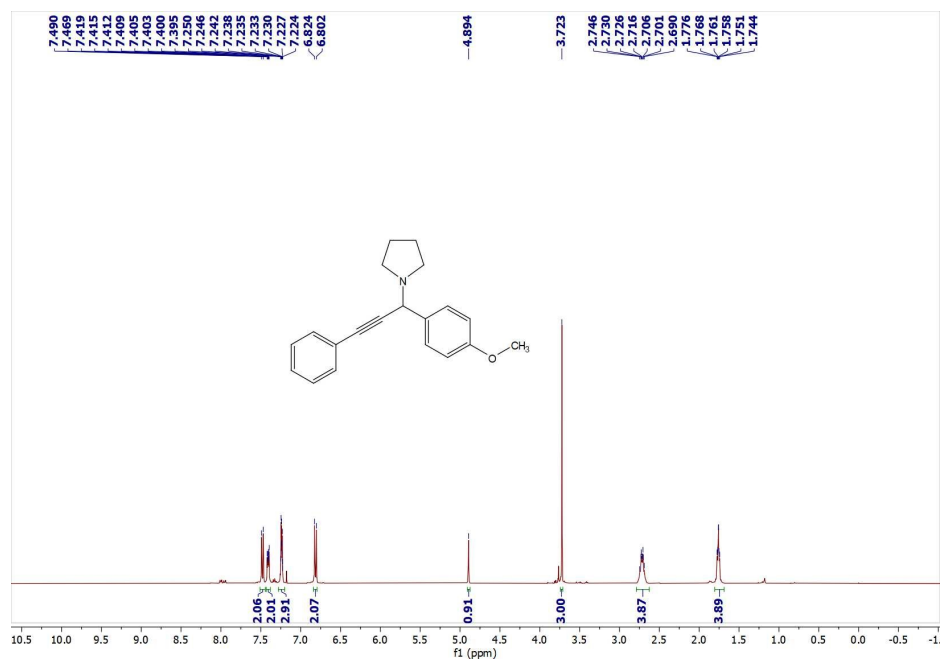

Fig. S17  $^1\text{H}$  NMR spectrum of **9baa** in  $\text{CDCl}_3$  (400 MHz)

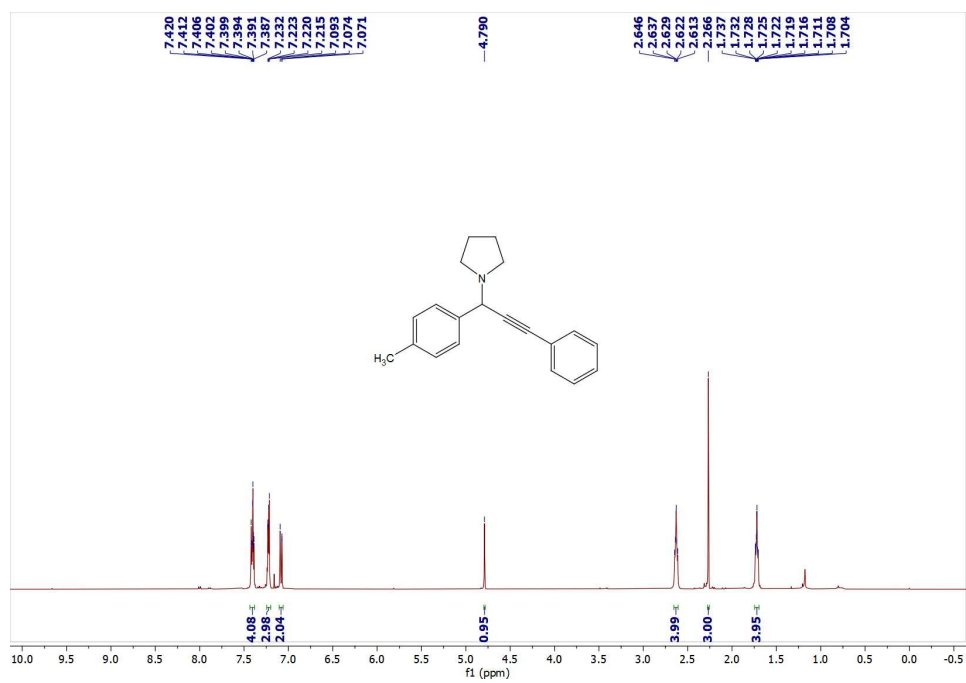

Fig. S18  $^1\text{H}$  NMR spectrum of **9caa** in  $\text{CDCl}_3$  (400 MHz)

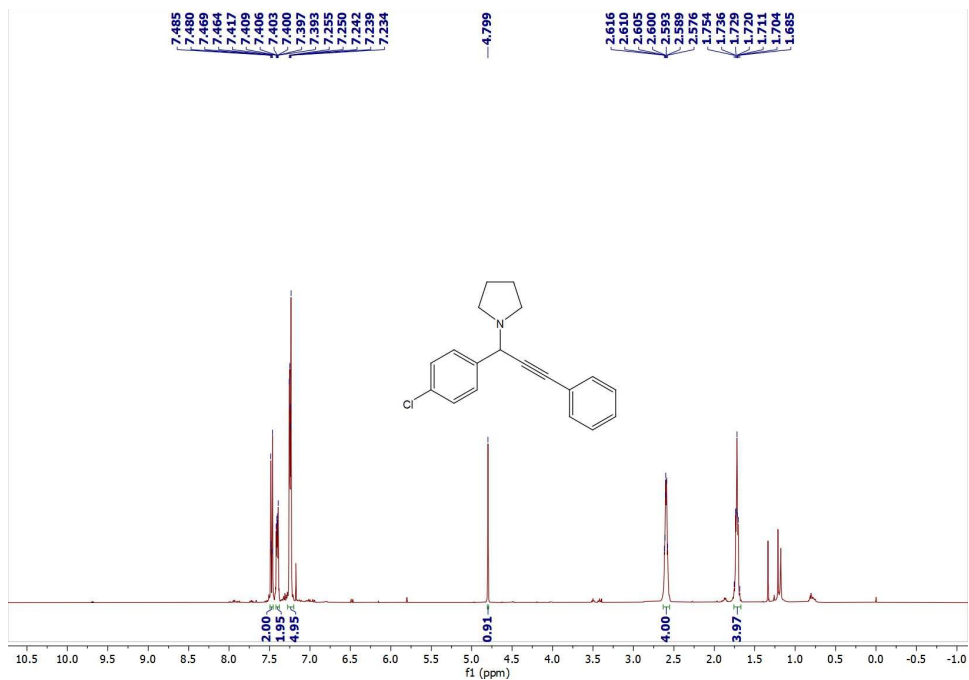

Fig. S19 <sup>1</sup>H NMR spectrum of **9daa** in CDCl<sub>3</sub> (400 MHz)

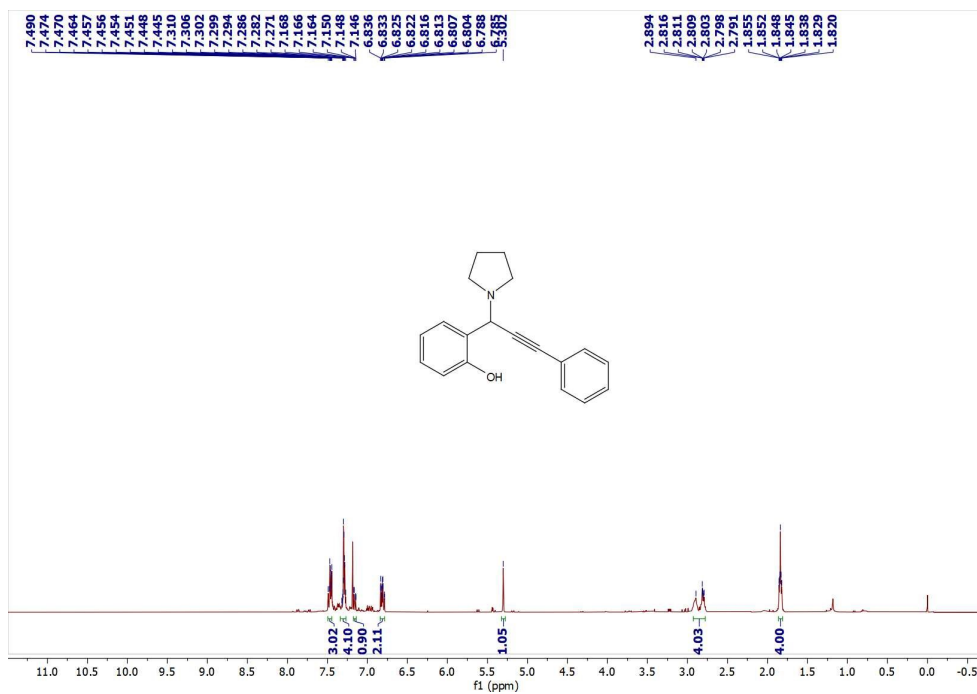

Fig. S20 <sup>1</sup>H NMR spectrum of **9eaa** in CDCl<sub>3</sub> (400 MHz)



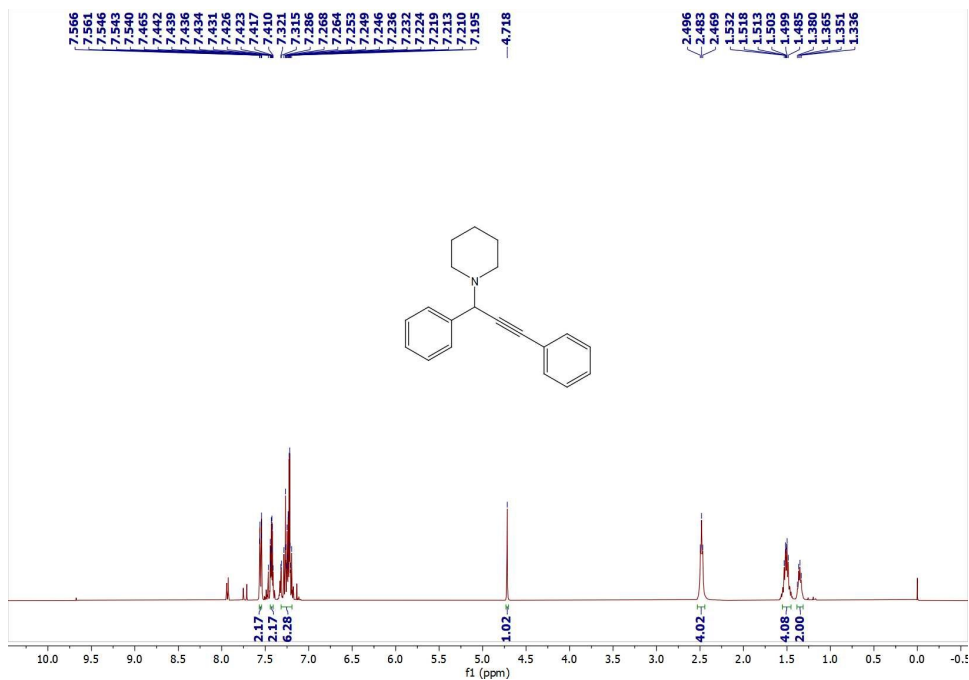

Fig. S21 <sup>1</sup>H NMR spectrum of **9aba** in CDCl<sub>3</sub> (400 MHz)

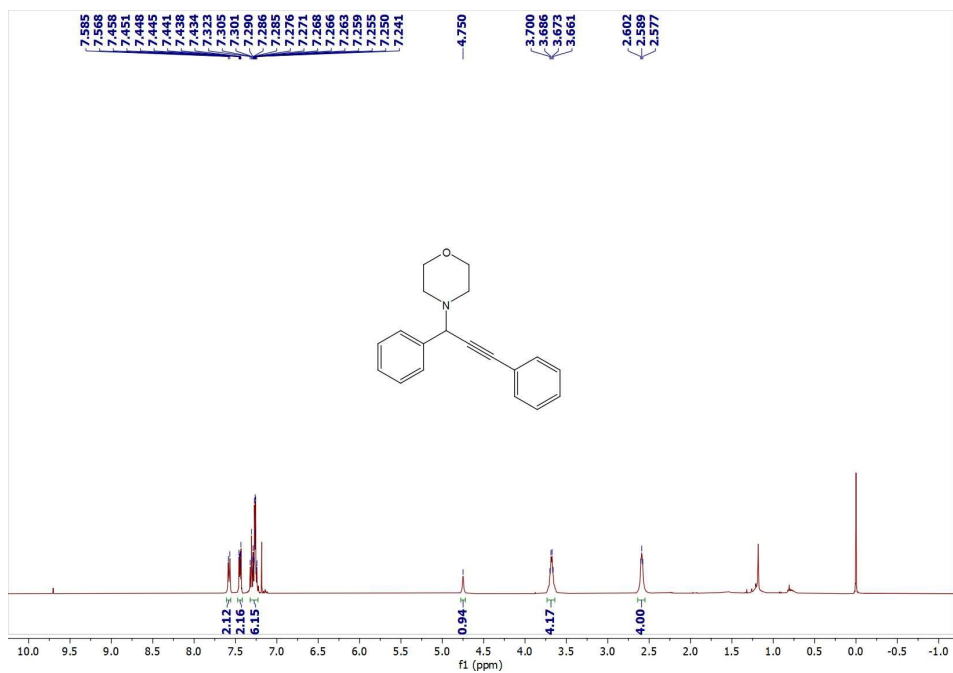

Fig. S22 <sup>1</sup>H NMR spectrum of **9aca** in CDCl<sub>3</sub> (400 MHz)



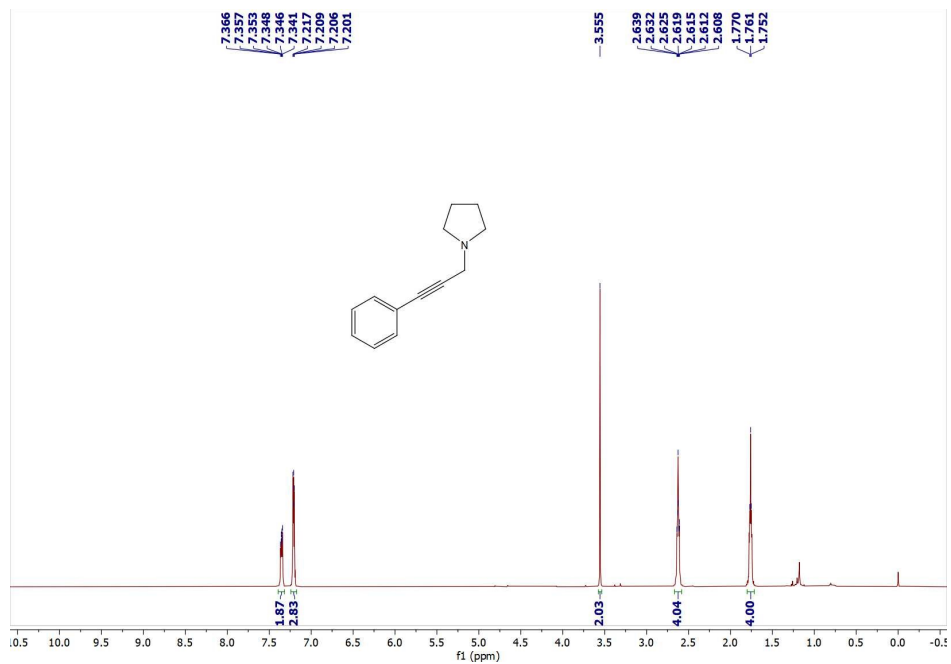

**Fig. S25**  $^1\text{H}$  NMR spectrum of **13aaa** in  $\text{CDCl}_3$  (400 MHz)

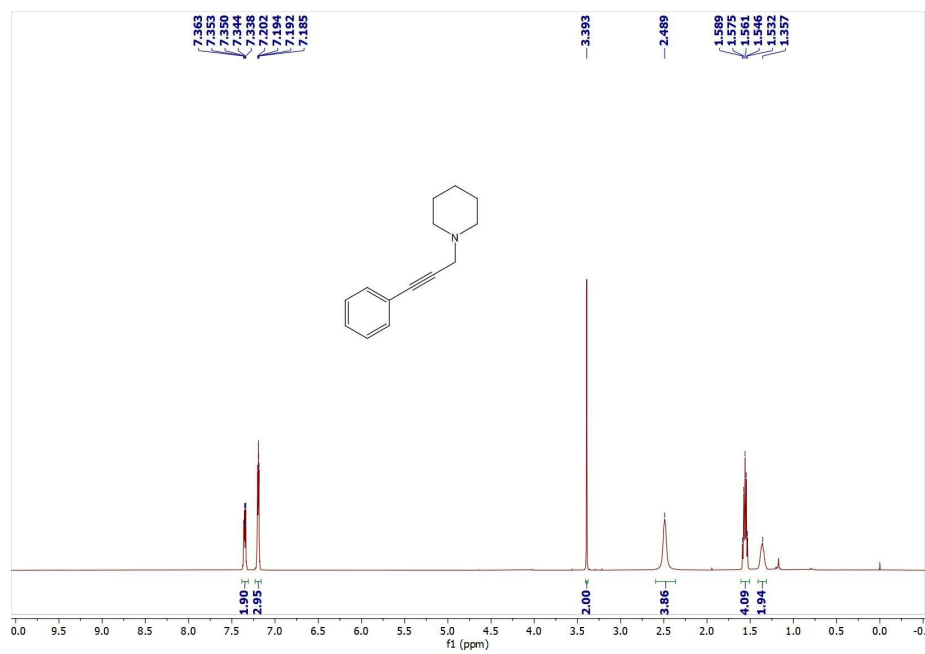

**Fig. S26**  $^1\text{H}$  NMR spectrum of **13aba** in  $\text{CDCl}_3$  (400 MHz)

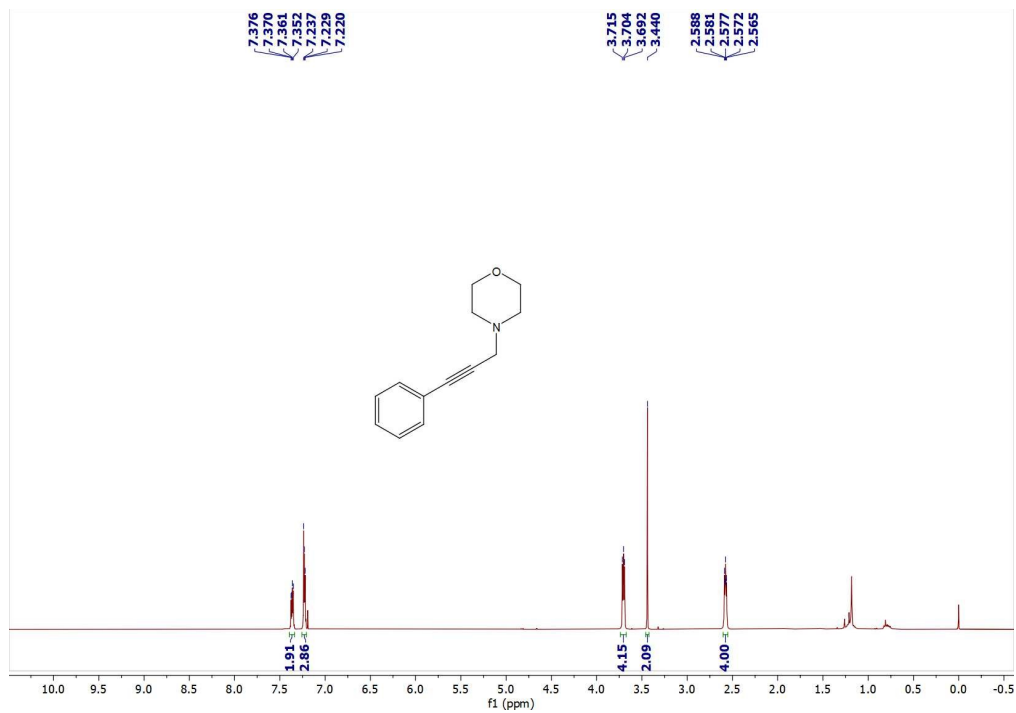

Fig. S27 <sup>1</sup>H NMR spectrum of **13aca** in CDCl<sub>3</sub> (400 MHz)

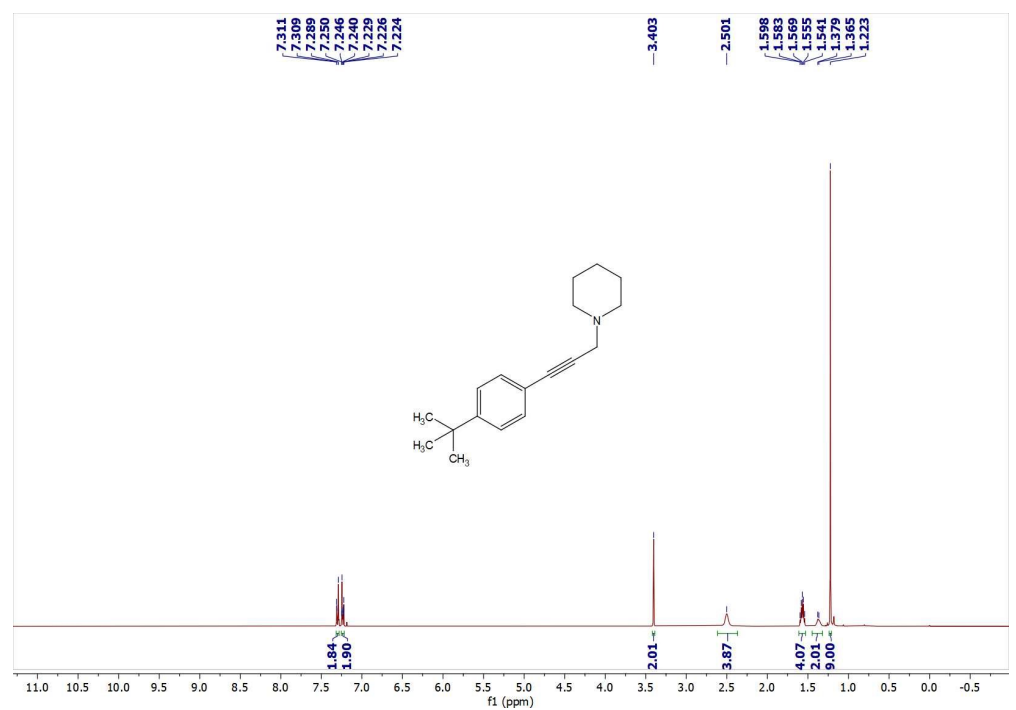

Fig. S28 <sup>1</sup>H NMR spectrum of **13bba** in CDCl<sub>3</sub> (400 MHz)

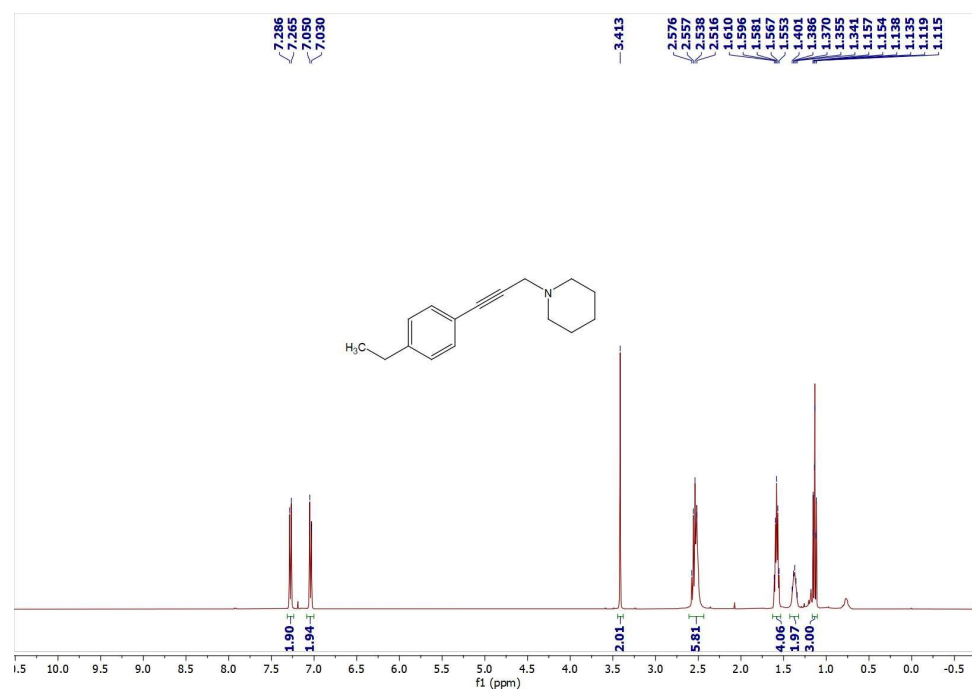

**Fig. S29**  $^1\text{H}$  NMR spectrum of **13ba** in  $\text{CDCl}_3$  (400 MHz)

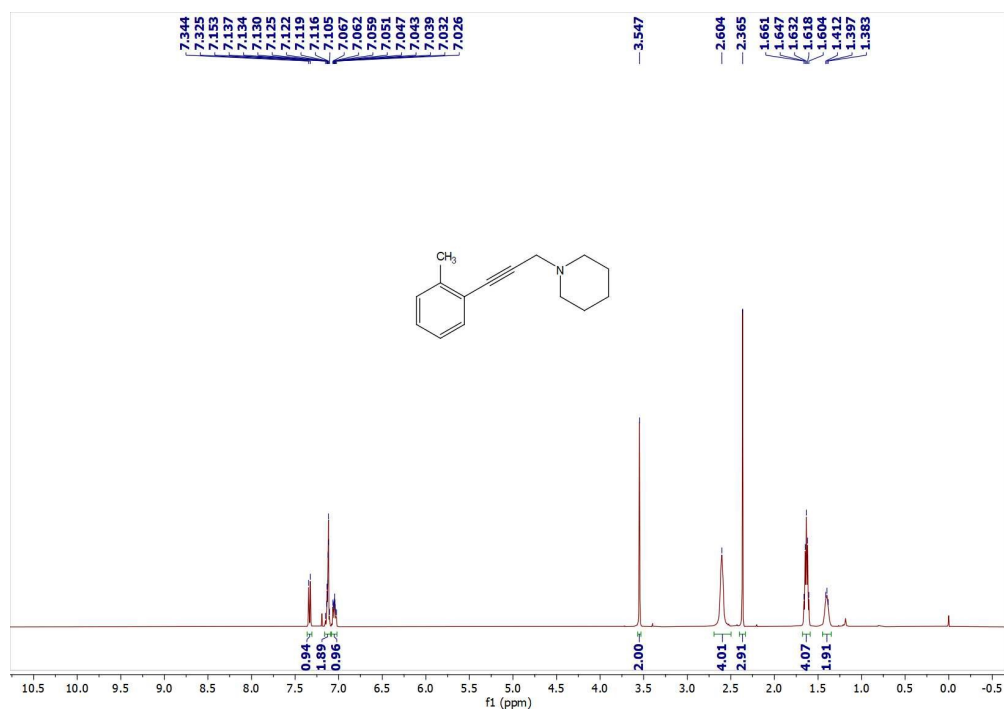

**Fig. S30**  $^1\text{H}$  NMR spectrum of **13dba** in  $\text{CDCl}_3$  (400 MHz)

## References

- 1 B. Rukmanikrishnan and S. Muthusamy, *Adv. Polym. Technol.*, 2018, **37**, 50–59.
- 2 P. S. Gahlaut, D. Gautam, P. Lama and B. Jana, *New J. Chem.*, 2023, **47**, 6871–6879
- 3 M. Trose, M. Dell’Acqua, T. Pedrazzini, V. Pirovano, E. Gallo, E. Rossi, A. Caselli and G. Abbiati, *J. Org. Chem.*, 2014, **79**, 7311–7320.
- 4 C. Zhao and D. Seidel, *J. Am. Chem. Soc.*, 2015, **137**, 4650–4653.
- 5 A. Beillard, T. X. Métro, X. Bantreil, J. Martinez and F. Lamaty, *European J. Org. Chem.*, 2017, **2017**, 4642–4647.
- 6 G. Kumar, S. Pandey and R. Gupta, *Cryst. Growth Des.*, 2018, **18**, 5501–5511.
- 7 E. Loukopoulos, A. Abdul-Sada, E. M. E. Viseux, I. N. Lykakis and G. E. Kostakis, *Cryst. Growth Des.*, 2018, **18**, 5638–5651.
- 8 M. Y. Dou, X. Q. Huang and G. Y. Yang, *CrystEngComm*, 2020, **22**, 2642–2648.
- 9 C. Costabile, A. Mariconda, M. Sirignano, A. Crispini, F. Scarpelli and P. Longo, *New J. Chem.*, 2021, **45**, 18509–18517.
- 10 E. Brambilla, A. Bortolla, V. Pirovano, A. Caselli, M. Tiecco and G. Abbiati, *Appl. Organomet. Chem.*, 2022, **36**, 1–10.
- 11 R. K. Aparna, S. Mukherjee, S. S. Rose and S. Mandal, *Inorg. Chem.*, 2022, **61**, 16441–16447.
- 12 S. Sharma, S. Sharma, N. Sharma, V. Sharma and S. Paul, *New J. Chem.*, 2023, **47**, 4674–4686.
- 13 Y. Zhang, P. Li, M. Wang and L. Wang, *J. Org. Chem.*, 2009, **74**, 4364–4367.
- 14 C. Wei and C. J. Li, *J. Am. Chem. Soc.*, 2003, **125**, 9584–9585.
- 15 X. Zhang and A. Corma, *Angew. Chemie - Int. Ed.*, 2008, **47**, 4358–4361.
- 16 M. Koohgard and M. Hosseini-Sarvari, *Catal. Sci. Technol.*, 2020, **10**, 6825–6839.
- 17 D. Yu and Y. Zhang, *Adv. Synth. Catal.*, 2011, **353**, 163–169.
- 18 W. J. Sun and E. Q. Gao, *Appl. Catal. A Gen.*, 2019, **569**, 110–116.
- 19 A. Singh, A. Maji, A. Mohanty and K. Ghosh, *New J. Chem.*, 2020, **44**, 18399–18418.
- 20 S. Yan, S. Pan, T. Osako and Y. Uozumi, *ACS Sustain. Chem. Eng.*, 2019, **7**, 9097–9102.
